# Supplementary material for: Effect of luminal surface structure of decellularized aorta on thrombus formation and cell behavior
Source: PLoS One. 2021 May 17;16(5):e0246221. doi: 10.1371/journal.pone.0246221 (PMC8128234; doi:10.1371/journal.pone.0246221)
Supplement: S1 File — (XLSX) [file pone.0246221.s001.xlsx]

## Sheet: Summary
concentration(ng/mL)	fluorescence intensity			fluorescence intensity ave	-blank
1000	64581	68673	65922	66392	66310
500	34018	32786	32015	32939.7	32857.7
250	17505	16216	16211	16644	16562
125	7957	7650	7831	7812.67	7730.67
62.5	4219	4042	4051	4104	4022
31.2	2096	2108	2142	2115.33	2033.33
15.6	1176	1071	1136	1127.67	1045.67
7.8	661	698	631	663.333	581.333
3.9	321	365	375	353.667	271.667
1.95	214	217	219	216.667	134.667
0.975	117	139	135	130.333	48.3333
0	90	80	76	82	0
								calibration curve
							slope	66.238
							y-intercept	67.316
Sample name	dry tissue weight(mg)	Absorbance	-blank	concentration(ng/mL)	final concentration(ng/mL)	residual DNA(ng/mg）	residual DNA(μg/mg）	residual DNA ave(μg/mg）	S.D
Artery untreated-1	20.39	21239	21157	318.393	159196	11451.1	11.4511	13.7814	1.61966
Artery untreated-2	20.88	29268	29186	439.607	219803	15439.6	15.4396
Artery untreated-3	20.9	30740	30658	461.83	230915	16204.6	16.2046
Artery untreated-4	20.61	25707	25625	385.846	192923	13729	13.729
Artery untreated-5	20.43	23370	23288	350.564	175282	12583.5	12.5835
Artery untreated-6	20.68	24957	24875	374.523	187262	13281	13.281
Artery HHP-1	20.91	373	291	3.37697	168.849	11.8434	0.0118434	0.00564678	0.00332226
Artery HHP-2	20.14	178	96	0.433044	21.6522	1.57679	0.00157679
Artery HHP-3	20.8	215	133	0.991636	49.5818	3.49615	0.00349615
Artery HHP-4	20.67	217	135	1.02183	51.0915	3.62526	0.00362526
Artery HHP-5	20.86	284	202	2.03333	101.667	7.14819	0.00714819
Artery HHP-6	20.33	263	181	1.7163	85.8148	6.19093	0.00619093
